# Supplementary material for: Prolyl isomerization of the CENP-A N-terminus regulates centromeric integrity in fission yeast
Source: PubMed Central journal article supplement — Nucleic Acids Res. 2017 Nov 29;46(3):1167–79. doi: 10.1093/nar/gkx1180 (PMC5814953; doi:10.1093/nar/gkx1180), 2017-11-29
Supplement: gkx1180_supp.pdf [file gkx1180_supp.pdf]

# **Supplementary Information**

## **(9 Figures and 3 Tables)**

### **Prolyl isomerization of the CENP-A N-terminus regulates centromeric integrity in fission yeast**

Hwei Ling Tan<sup>1,2</sup>, Kim Kiat Lim<sup>1,2</sup>, Qiaoyun Yang<sup>3</sup>, Jing-Song Fan<sup>3</sup>, Ahmed Mahmoud Mohammed Sayed<sup>3</sup>, Liy Sim Low<sup>1,2</sup>, Bingbing Ren<sup>1,2</sup>, Teck Kwang Lim<sup>3</sup>, Qingsong Lin<sup>3</sup>, Yu-Keung Mok<sup>3</sup>, Yih-Cherng Liou<sup>3,4</sup>, and Ee Sin Chen<sup>1,2,4,\*</sup>

<sup>1</sup>Department of Biochemistry, National University of Singapore, 117597, Singapore.

<sup>2</sup>National University Health System (NUHS), Singapore, 119228, Singapore.

<sup>3</sup>Department of Biological Sciences, National University of Singapore, 117543, Singapore. <sup>4</sup>NUS Graduate School for Integrative Sciences and Engineering, National University of Singapore, 119228, Singapore.

\* To whom correspondence should be addressed. Ee Sin Chen, Tel: +65-6516-5616;

Email: bchces@nus.edu.sg

## Supplementary Tables

**Supplementary Table S1** List of strains ectopically expressing alanine point-mutation constructs, single copy integration strains and epitope-tagged strains.

| <b>Overexpression strains - Site directed amino acids substitution</b> |                    |                          |                   |                   |                   |                   |                   |
|------------------------------------------------------------------------|--------------------|--------------------------|-------------------|-------------------|-------------------|-------------------|-------------------|
| <b>Name</b>                                                            | <b>Host Strain</b> | <b>Transform plasmid</b> | <b><i>his</i></b> | <b><i>lys</i></b> | <b><i>leu</i></b> | <b><i>ura</i></b> | <b><i>ade</i></b> |
| K3A                                                                    | HF123              | pREP41-K3A               | <i>his</i> +      | <i>lys</i> +      | <i>leu</i> +      | <i>ura</i> +      | <i>ade</i> +      |
| K4A                                                                    | HF123              | pREP41-K4A               | <i>his</i> +      | <i>lys</i> +      | <i>leu</i> +      | <i>ura</i> +      | <i>ade</i> +      |
| S5A                                                                    | HF123              | pREP41-S5A               | <i>his</i> +      | <i>lys</i> +      | <i>leu</i> +      | <i>ura</i> +      | <i>ade</i> +      |
| L6A                                                                    | HF123              | pREP41-L6A               | <i>his</i> +      | <i>lys</i> +      | <i>leu</i> +      | <i>ura</i> +      | <i>ade</i> +      |
| M7A                                                                    | HF123              | pREP41-M7A               | <i>his</i> +      | <i>lys</i> +      | <i>leu</i> +      | <i>ura</i> +      | <i>ade</i> +      |
| E9A                                                                    | HF123              | pREP41-E9A               | <i>his</i> +      | <i>lys</i> +      | <i>leu</i> +      | <i>ura</i> +      | <i>ade</i> +      |
| P10A                                                                   | HF123              | pREP41-P10A              | <i>his</i> +      | <i>lys</i> +      | <i>leu</i> +      | <i>ura</i> +      | <i>ade</i> +      |
| G11A                                                                   | HF123              | pREP41-G11A              | <i>his</i> +      | <i>lys</i> +      | <i>leu</i> +      | <i>ura</i> +      | <i>ade</i> +      |
| D12A                                                                   | HF123              | pREP41-D12A              | <i>his</i> +      | <i>lys</i> +      | <i>leu</i> +      | <i>ura</i> +      | <i>ade</i> +      |
| P13A                                                                   | HF123              | pREP41-P13A              | <i>his</i> +      | <i>lys</i> +      | <i>leu</i> +      | <i>ura</i> +      | <i>ade</i> +      |
| I14A                                                                   | HF123              | pREP41-I14A              | <i>his</i> +      | <i>lys</i> +      | <i>leu</i> +      | <i>ura</i> +      | <i>ade</i> +      |
| P15A                                                                   | HF123              | pREP41-P15A              | <i>his</i> +      | <i>lys</i> +      | <i>leu</i> +      | <i>ura</i> +      | <i>ade</i> +      |
| R16A                                                                   | HF123              | pREP41-R16A              | <i>his</i> +      | <i>lys</i> +      | <i>leu</i> +      | <i>ura</i> +      | <i>ade</i> +      |
| P17A                                                                   | HF123              | pREP41-P17A              | <i>his</i> +      | <i>lys</i> +      | <i>leu</i> +      | <i>ura</i> +      | <i>ade</i> +      |
| R18A                                                                   | HF123              | pREP41-R18A              | <i>his</i> +      | <i>lys</i> +      | <i>leu</i> +      | <i>ura</i> +      | <i>ade</i> +      |
| K19A                                                                   | HF123              | pREP41-K19A              | <i>his</i> +      | <i>lys</i> +      | <i>leu</i> +      | <i>ura</i> +      | <i>ade</i> +      |
| K20A                                                                   | HF123              | pREP41-K20A              | <i>his</i> +      | <i>lys</i> +      | <i>leu</i> +      | <i>ura</i> +      | <i>ade</i> +      |
| R21A                                                                   | HF123              | pREP41-R21A              | <i>his</i> +      | <i>lys</i> +      | <i>leu</i> +      | <i>ura</i> +      | <i>ade</i> +      |
| Y22A                                                                   | HF123              | pREP41-Y22A              | <i>his</i> +      | <i>lys</i> +      | <i>leu</i> +      | <i>ura</i> +      | <i>ade</i> +      |
| R23A                                                                   | HF123              | pREP41-R23A              | <i>his</i> +      | <i>lys</i> +      | <i>leu</i> +      | <i>ura</i> +      | <i>ade</i> +      |
| P24A                                                                   | HF123              | pREP41-P24A              | <i>his</i> +      | <i>lys</i> +      | <i>leu</i> +      | <i>ura</i> +      | <i>ade</i> +      |
| G25A                                                                   | HF123              | pREP41-G25A              | <i>his</i> +      | <i>lys</i> +      | <i>leu</i> +      | <i>ura</i> +      | <i>ade</i> +      |
| T26A                                                                   | HF123              | pREP41-T26A              | <i>his</i> +      | <i>lys</i> +      | <i>leu</i> +      | <i>ura</i> +      | <i>ade</i> +      |

|         |       |                |      |      |      |      |      |
|---------|-------|----------------|------|------|------|------|------|
| T27A    | HF123 | pREP41-T27A    | his+ | lys+ | leu+ | ura+ | ade+ |
| 4PA-GFP | HF123 | pREP41-4PA-GFP | his+ | lys+ | leu+ | ura+ | ade+ |
| FL-GFP  | HF123 | pREP41-FL-GFP  | his+ | lys+ | leu+ | ura+ | ade+ |

**Overexpression strains - Suppression**

| Name                                         | Host Strain       | Transform plasmid                    | his  | lys | leu  | ura  | ade  |
|----------------------------------------------|-------------------|--------------------------------------|------|-----|------|------|------|
| <i>Δani1</i> -vector                         | <i>Δani1</i>      | pREP41                               | his+ | -   | leu+ | -    | ade- |
| <i>Δani1</i> -FL                             | <i>Δani1</i>      | pREP41- <i>ani1</i> -FL              | his+ | -   | leu+ | -    | ade- |
| <i>Δani1</i> - <i>ΔPPIase</i>                | <i>Δani1</i>      | pREP41- <i>ani1</i> - <i>ΔPPIase</i> | his+ | -   | leu+ | -    | ade- |
| <i>Δani2</i> -vector                         | <i>Δani2</i>      | pREP41                               | his+ | -   | leu+ | ura+ | ade+ |
| <i>Δani2</i> -FL                             | <i>Δani2</i>      | pREP41- <i>ani2</i> FL               | his+ | -   | leu+ | ura+ | ade+ |
| <i>Δani2</i> - <i>ΔPPIase</i>                | <i>Δani2</i>      | pREP41- <i>ani2</i> - <i>ΔPPIase</i> | his+ | -   | leu+ | ura+ | ade+ |
| WT-vector                                    | HF123             | pREP41                               | his+ | -   | leu+ | ura+ | ade+ |
| WT- <i>sim3</i> <sup>+</sup>                 | HF123             | pREP41- <i>sim3</i> HIS              | his+ | -   | leu+ | ura+ | ade+ |
| P13A-vector                                  | P13A              | pREP41                               | his+ | -   | leu+ | ura+ | ade+ |
| P13A- <i>sim3</i> <sup>+</sup>               | P13A              | pREP41- <i>sim3</i> HIS              | his+ | -   | leu+ | ura+ | ade+ |
| P15A-vector                                  | P15A              | pREP41                               | his+ | -   | leu+ | ura+ | ade- |
| P15A- <i>sim3</i> <sup>+</sup>               | P15A              | pREP41- <i>sim3</i> HIS              | his+ | -   | leu+ | ura+ | ade- |
| P13AP15A-vector                              | P13AP15A          | pREP41                               | his+ | -   | leu+ | ura+ | ade+ |
| P13AP15A- <i>sim3</i> <sup>+</sup>           | P13AP15A          | pREP41- <i>sim3</i> HIS              | his+ | -   | leu+ | ura+ | ade+ |
| <i>Δani1Δani2</i> -vector                    | <i>Δani1Δani2</i> | pREP41                               | his+ | -   | leu+ | ura+ | ade+ |
| <i>Δani1Δani2</i> - <i>sim3</i> <sup>+</sup> | <i>Δani1Δani2</i> | pREP41- <i>sim3</i> HIS              | his+ | -   | leu+ | ura+ | ade+ |

**Single Copy Integrant Strain / Deletion strains**

| Name | Locus of integration | Mutation | lys | leu | ura |
|------|----------------------|----------|-----|-----|-----|
|------|----------------------|----------|-----|-----|-----|

|                                                    |                                                   |                                                                                                                |                         |                         |                         |
|----------------------------------------------------|---------------------------------------------------|----------------------------------------------------------------------------------------------------------------|-------------------------|-------------------------|-------------------------|
| <i>cnp1-4PA</i>                                    | <i>cnp1</i> <sup>+</sup>                          | P10A,P13A,P15A,P17A                                                                                            | <i>lys</i> <sup>+</sup> | <i>leu</i> <sup>-</sup> | <i>ura</i> <sup>+</sup> |
| <i>cnp1-P13A</i>                                   | <i>cnp1</i> <sup>+</sup>                          | P13A                                                                                                           | -                       | <i>leu</i> <sup>-</sup> | <i>ura</i> <sup>+</sup> |
| <i>cnp1-P15A</i>                                   | <i>cnp1</i> <sup>+</sup>                          | P15A                                                                                                           | <i>lys</i> <sup>+</sup> | <i>leu</i> <sup>-</sup> | <i>ura</i> <sup>+</sup> |
| <i>cnp1-P13AP15A</i>                               | <i>cnp1</i> <sup>+</sup>                          | P13A,P15A                                                                                                      | -                       | <i>leu</i> <sup>-</sup> | <i>ura</i> <sup>-</sup> |
| <i>cnp1-WT</i>                                     | <i>cnp1</i> <sup>+</sup>                          | -                                                                                                              | -                       | <i>leu</i> <sup>-</sup> | <i>ura</i> <sup>+</sup> |
| <i>cnp1-E9A</i>                                    | <i>cnp1</i> <sup>+</sup>                          | E9A                                                                                                            | <i>lys</i> <sup>-</sup> | <i>leu</i> <sup>-</sup> | <i>ura</i> <sup>-</sup> |
| <i>cnp1-P10A</i>                                   | <i>cnp1</i> <sup>+</sup>                          | P10A                                                                                                           | <i>lys</i> <sup>-</sup> | <i>leu</i> <sup>-</sup> | <i>ura</i> <sup>-</sup> |
| <i>cnp1-G11A</i>                                   | <i>cnp1</i> <sup>+</sup>                          | G11A                                                                                                           | <i>lys</i> <sup>-</sup> | <i>leu</i> <sup>-</sup> | <i>ura</i> <sup>-</sup> |
| <i>cnp1-D12A</i>                                   | <i>cnp1</i> <sup>+</sup>                          | D12A                                                                                                           | <i>lys</i> <sup>-</sup> | <i>leu</i> <sup>-</sup> | <i>ura</i> <sup>-</sup> |
| <i>cnp1-I14A</i>                                   | <i>cnp1</i> <sup>+</sup>                          | I14A                                                                                                           | <i>lys</i> <sup>-</sup> | <i>leu</i> <sup>-</sup> | <i>ura</i> <sup>-</sup> |
| <i>cnp1-R16A</i>                                   | <i>cnp1</i> <sup>+</sup>                          | R16A                                                                                                           | <i>lys</i> <sup>-</sup> | <i>leu</i> <sup>-</sup> | <i>ura</i> <sup>-</sup> |
| <i>cnp1-P17A</i>                                   | <i>cnp1</i> <sup>+</sup>                          | P17A                                                                                                           | <i>lys</i> <sup>-</sup> | <i>leu</i> <sup>-</sup> | <i>ura</i> <sup>-</sup> |
| <i>cnp1-R18A</i>                                   | <i>cnp1</i> <sup>+</sup>                          | R18A                                                                                                           | <i>lys</i> <sup>-</sup> | <i>leu</i> <sup>-</sup> | <i>ura</i> <sup>-</sup> |
| <i>cnp1-K19A</i>                                   | <i>cnp1</i> <sup>+</sup>                          | K19A                                                                                                           | <i>lys</i> <sup>-</sup> | <i>leu</i> <sup>-</sup> | <i>ura</i> <sup>-</sup> |
| <i>cnp1-K20A</i>                                   | <i>cnp1</i> <sup>+</sup>                          | K20A                                                                                                           | <i>lys</i> <sup>-</sup> | <i>leu</i> <sup>-</sup> | <i>ura</i> <sup>-</sup> |
| <i>cnp1-R21A</i>                                   | <i>cnp1</i> <sup>+</sup>                          | R21A                                                                                                           | <i>lys</i> <sup>-</sup> | <i>leu</i> <sup>-</sup> | <i>ura</i> <sup>-</sup> |
| <i>cnp1-Y22A</i>                                   | <i>cnp1</i> <sup>+</sup>                          | Y22A                                                                                                           | <i>lys</i> <sup>-</sup> | <i>leu</i> <sup>-</sup> | <i>ura</i> <sup>-</sup> |
|                                                    |                                                   |                                                                                                                |                         |                         |                         |
| $\Delta$ <i>ani1</i>                               | <i>ani1</i> <sup>+</sup>                          | <i>ani1</i> <sup>+</sup> :: <i>kanR</i> <sup>+</sup>                                                           | -                       | <i>leu</i> <sup>-</sup> | -                       |
| $\Delta$ <i>ani2</i>                               | <i>ani2</i> <sup>+</sup>                          | <i>ani2</i> <sup>+</sup> :: <i>kanR</i> <sup>+</sup>                                                           | -                       | <i>leu</i> <sup>-</sup> | <i>ura</i> <sup>+</sup> |
| $\Delta$ <i>ani1</i>                               | <i>ani1</i> <sup>+</sup>                          | <i>ani1</i> <sup>+</sup> :: <i>kanR</i> <sup>+</sup>                                                           | <i>lys</i> <sup>+</sup> | <i>leu</i> <sup>+</sup> | <i>ura</i> <sup>+</sup> |
| $\Delta$ <i>ani2</i>                               | <i>ani2</i> <sup>+</sup>                          | <i>ani2</i> <sup>+</sup> :: <i>kanR</i> <sup>+</sup>                                                           | <i>lys</i> <sup>+</sup> | <i>leu</i> <sup>+</sup> | <i>ura</i> <sup>+</sup> |
| $\Delta$ <i>ani1<math>\Delta</math><i>ani2</i></i> | <i>ani1</i> <sup>+</sup> <i>ani2</i> <sup>+</sup> | <i>ani1</i> <sup>+</sup> :: <i>kanR</i> <sup>+</sup> ,<br><i>ani2</i> <sup>+</sup> :: <i>kanR</i> <sup>+</sup> | <i>lys</i> <sup>+</sup> | <i>leu</i> <sup>+</sup> | <i>ura</i> <sup>+</sup> |
| $\Delta$ <i>ani1<math>\Delta</math><i>ani2</i></i> | <i>ani1</i> <sup>+</sup> <i>ani2</i> <sup>+</sup> | <i>ani1</i> <sup>+</sup> :: <i>kanR</i> <sup>+</sup> ,<br><i>ani2</i> <sup>+</sup> :: <i>kanR</i> <sup>+</sup> | <i>lys</i> <sup>+</sup> | <i>leu</i> <sup>-</sup> | <i>ura</i> <sup>+</sup> |

|                               |
|-------------------------------|
| <b>Epitope-tagged Strains</b> |
|-------------------------------|

| Name                                    | Tagged Gene/locus                                                                                                                                           | Tag          | Gene                                                | Mutations           |
|-----------------------------------------|-------------------------------------------------------------------------------------------------------------------------------------------------------------|--------------|-----------------------------------------------------|---------------------|
| <i>WT CEN1-GFP</i>                      | centromere I                                                                                                                                                | GFP          | <i>cnp1</i> <sup>+</sup>                            |                     |
| <i>4PA CEN1-GFP</i>                     | centromere I                                                                                                                                                | GFP          | <i>cnp1</i> <sup>+</sup>                            | P10A,P13A,P15A,P17A |
| <i>WTGFP-cnp1HA</i>                     | <i>cnp1</i> 3' end,<br>lys <sup>-</sup>                                                                                                                     | GFP,HA       | <i>cnp1</i> <sup>+</sup> , <i>cnp1</i> <sup>+</sup> |                     |
| <i>4PAGFP-cnp1HA</i>                    | <i>cnp1</i> 3' end,<br>lys <sup>-</sup>                                                                                                                     | GFP,HA       | <i>cnp1</i> <sup>+</sup> , <i>cnp1</i> <sup>+</sup> | P10A,P13A,P15A,P17A |
| <i>Ani1GFP</i>                          | <i>ani1</i> 3' end                                                                                                                                          | GFP          | <i>ani1</i> <sup>+</sup>                            |                     |
| <i>Ani2GFP</i>                          | <i>ani2</i> 3' end                                                                                                                                          | GFP          | <i>ani2</i> <sup>+</sup>                            |                     |
| <i>Ani1GFP+Cbh1HA</i>                   | <i>ani1</i> 3' end, <i>cbh1</i><br>3' end                                                                                                                   | GFP,HA       | <i>ani1</i> <sup>+</sup> , <i>cbh1</i> <sup>+</sup> |                     |
| <i>Ani2GFP+Cbh1HA</i>                   | <i>ani2</i> 3' end, <i>cbh1</i><br>3' end                                                                                                                   | GFP,HA       | <i>ani2</i> <sup>+</sup> , <i>cbh1</i> <sup>+</sup> |                     |
| <i>Ani1FLAG+SpCENP-A-GFP</i>            | <i>ani1</i> 3'end, <i>cnp1</i><br>3' end                                                                                                                    | FLAG,<br>GFP | <i>ani1</i> <sup>+</sup> , <i>cnp1</i> <sup>+</sup> |                     |
| <i>Ani2FLAG+SpCENP-A-GFP</i>            | <i>ani2</i> 3'end, <i>cnp1</i><br>3' end                                                                                                                    | FLAG,<br>GFP | <i>ani2</i> <sup>+</sup> , <i>cnp1</i> <sup>+</sup> |                     |
| <i>ani1GFP+Sim3FLAG</i>                 | <i>ani1</i> 3' end, <i>sim3</i><br>3'end                                                                                                                    | GFP,<br>FLAG | <i>ani1</i> <sup>+</sup> , <i>sim3</i> <sup>+</sup> |                     |
| <i>ani2GFP+Sim3FLAG</i>                 | <i>ani2</i> 3' end, <i>sim3</i><br>3'end                                                                                                                    | GFP,<br>FLAG | <i>ani2</i> <sup>+</sup> , <i>sim3</i> <sup>+</sup> |                     |
| <i>Δani1Δani2+Sim3FLAG<br/>+Cbh1-HA</i> | <i>ani1</i> <sup>+</sup> :: <i>kanR</i> <sup>+</sup> ,<br><i>ani2</i> <sup>+</sup> :: <i>kanR</i> <sup>+</sup> ,<br><i>sim3</i> 3'end, <i>cbh1</i><br>3'end | FLAG,HA      | <i>sim3</i> <sup>+</sup> , <i>cbh1</i> <sup>+</sup> | <i>Δani1Δani2</i>   |
| <i>Δani1+Sim3FLAG+Cbh<br/>1-HA</i>      | <i>ani1</i> <sup>+</sup> :: <i>kanR</i> <sup>+</sup> ,<br><i>sim3</i> 3'end, <i>cbh1</i><br>3'end                                                           | FLAG, HA     | <i>sim3</i> <sup>+</sup> , <i>cbh1</i> <sup>+</sup> | <i>Δani1</i>        |
| <i>Δani2+Sim3FLAG+Cbh<br/>1-HA</i>      | <i>ani2</i> <sup>+</sup> :: <i>kanR</i> <sup>+</sup> ,<br><i>sim3</i> 3'end, <i>cbh1</i><br>3'end                                                           | FLAG,HA      | <i>sim3</i> <sup>+</sup> , <i>cbh1</i> <sup>+</sup> | <i>Δani2</i>        |
| <i>Δani1Δani2+SpCenp-A-<br/>HA</i>      | <i>ani1</i> <sup>+</sup> :: <i>kanR</i> <sup>+</sup> ,<br><i>ani2</i> <sup>+</sup> :: <i>kanR</i> <sup>+</sup> ,                                            | HA           | <i>cnp1</i> <sup>+</sup>                            | <i>Δani1Δani2</i>   |

|                                    |                                                                                                          |    |                          |               |
|------------------------------------|----------------------------------------------------------------------------------------------------------|----|--------------------------|---------------|
|                                    | <i>cnp1</i> <sup>+</sup> 3'end <i>lys loci</i>                                                           |    |                          |               |
| $\Delta ani1$ + <i>SpCenp-A-HA</i> | <i>ani1</i> <sup>+</sup> :: <i>kanR</i> <sup>+</sup> ,<br><i>cnp1</i> <sup>+</sup> 3'end <i>lys loci</i> | HA | <i>cnp1</i> <sup>+</sup> | $\Delta ani1$ |
| $\Delta ani2$ + <i>SpCenp-A-HA</i> | <i>ani2</i> <sup>+</sup> :: <i>kanR</i> <sup>+</sup> ,<br><i>cnp1</i> <sup>+</sup> 3'end <i>lys loci</i> | HA | <i>cnp1</i> <sup>+</sup> | $\Delta ani2$ |

**Supplementary Table S2** List of primers employed for making alanine site-directed mutations, 6× His epitope-tagging of Ani1 and Ani2 and for PCR detection of ChIP signals at the centromere.

| <b>Site-Mutated Primers</b>               |                                          |
|-------------------------------------------|------------------------------------------|
| <b>Site mutated (Overlapping primers)</b> | <b>Forward 5'- 3'</b>                    |
| Cnp-1 K3A                                 | GAACAACCTTAATATGGCAGCGAAATCTTTAATGGCTGAG |
| Cnp-1 K4A                                 | CAACTTAATATGGCAAAGGCATCTTTAATGGCTGAGCCT  |
| Cnp-1 S5A                                 | CTTAATATGGCAAAGAAAGCTTTAATGGCTGAGCCTGGA  |
| Cnp-1 L6A                                 | AATATGGCAAAGAAATCTGCAATGGCTGAGCCTGGAGAT  |
| Cnp-1 M7A                                 | ATGGCAAAGAAATCTTTAGCGGCTGAGCCTGGAGATCCT  |
| Cnp-1 E9A                                 | AAGAAATCTTTAATGGCTGCGCCTGGAGATCCTATTCCA  |
| Cnp-1 P10A                                | AAATCTTTAATGGCTGAGGCTGGAGATCCTATTCCACGG  |
| Cnp-1 G11A                                | TCTTTAATGGCTGAGCCTGCAGATCCTATTCCACGGCCA  |
| Cnp-1 D12A                                | TTAATGGCTGAGCCTGGAGCTCCTATTCCACGGCCACGT  |
| Cnp-1 P13A                                | ATGGCTGAGCCTGGAGATGCTATTCCACGGCCACGTAAA  |
| Cnp-1 I14A                                | GCTGAGCCTGGAGATCCTGCTCCACGGCCACGTAAAAAG  |
| Cnp-1 P15A                                | GAGCCTGGAGATCCTATTGCACGGCCACGTAAAAAGAGA  |
| Cnp-1 R16A                                | CCTGGAGATCCTATTCCACGGCCACGTAAAAAGAGATAT  |
| Cnp-1 P17A                                | GGAGATCCTATTCCACGGGCACGTAAAAAGAGATATCGT  |

|                                                   |                                            |
|---------------------------------------------------|--------------------------------------------|
| Cnp-1 R18A                                        | GATCCTATTCCACGGCCAGCTAAAAAGAGATATCGTCCA    |
| Cnp-1 K19A                                        | CCTATTCCACGGCCACGTGCAAAGAGATATCGTCCAGGT    |
| Cnp-1 K20A                                        | ATTCCACGGCCACGTAAAGCGAGATATCGTCCAGGTACT    |
| Cnp-1 R21A                                        | CCACGGCCACGTAAAAAGGCATATCGTCCAGGTACTACG    |
| Cnp-1 Y22A                                        | CGGCCACGTAAAAAGAGAGCTCGTCCAGGTACTACGGCG    |
| Cnp-1 R23A                                        | CCACGTAAAAAGAGATATGCTCCAGGTACTACGGCGTTA    |
| Cnp-1 P24A                                        | CGTAAAAAGAGATATCGTGCAGGTACTACGGCGTTAAGA    |
| Cnp-1 G25A                                        | AAAAAGAGATATCGTCCAGCTACTACGGCGTTAAGAGAG    |
| Cnp-1 T26A                                        | AAGAGATATCGTCCAGGTGCTACGGCGTTAAGAGAGATT    |
| Cnp-1 T27A                                        | AGATATCGTCCAGGTACTGCGGGCGTTAAGAGAGATTCGA   |
| Cnp-1<br>P10.13.15.17A<br>(4PA)                   | GCTGGAGATGCTATTGCACGGGCACGTAAAAAGAGATATCGT |
| Cnp1 P13A                                         | ATGGCTGAGCCTGGAGATGCTATTCCACGGCCACGTAAA    |
| Cnp-1 P15A                                        | GAGCCTGGAGATCCTATTGCACGGCCACGTAAAAAGAGA    |
| Cnp-1<br>P13.15A                                  | GAGCCTGGAGATGCTATTGCACGGCCACGTAAAAAGAGA    |
|                                                   |                                            |
| <b>Site mutated<br/>(Overlapping<br/>primers)</b> | <b>Reverse 5'- 3'</b>                      |
| Cnp-1 K3A                                         | CTCAGCCATTAAGATTTTCGCTGCCATATTAAGTTGTTCC   |
| Cnp-1 K4A                                         | AGGCTCAGCCATTAAGATGCCTTTGCCATATTAAGTTG     |
| Cnp-1 S5A                                         | TCCAGGCTCAGCCATTAAGCTTTCTTTGCCATATTAAG     |
| Cnp-1 L6A                                         | ATCTCCAGGCTCAGCCATTGCAGATTTCTTTGCCATATT    |
| Cnp-1 M7A                                         | AGGATCTCCAGGCTCAGCCGCTAAAGATTTCTTTGCCAT    |
| Cnp-1 E9A                                         | TGGAATAGGATCTCCAGGCGCAGCCATTAAGATTTCTT     |
| Cnp-1 P10A                                        | CCGTGGAATAGGATCTCCAGCCTCAGCCATTAAGATTT     |
| Cnp-1 G11A                                        | TGGCCGTGGAATAGGATCTGCAGGCTCAGCCATTAAGA     |
| Cnp-1 D12A                                        | ACGTGGCCGTGGAATAGGAGCTCCAGGCTCAGCCATTAA    |
| Cnp-1 P13A                                        | TTTACGTGGCCGTGGAATAGCATCTCCAGGCTCAGCCAT    |

|                                 |                                            |
|---------------------------------|--------------------------------------------|
| Cnp-1 I14A                      | CTTTTTACGTGGCCGTGGAGCAGGATCTCCAGGCTCAGC    |
| Cnp-1 P15A                      | TCTCTTTTTACGTGGCCGTGCAATAGGATCTCCAGGCTC    |
| Cnp-1 R16A                      | ATATCTCTTTTTACGTGGCGCTGGAATAGGATCTCCAGG    |
| Cnp-1 P17A                      | ACGATATCTCTTTTTACGTGCCCGTGGAATAGGATCTCC    |
| Cnp-1 R18A                      | TGGACGATATCTCTTTTTAGCTGGCCGTGGAATAGGATC    |
| Cnp-1 K19A                      | ACCTGGACGATATCTCTTTGCACGTGGCCGTGGAATAGG    |
| Cnp-1 K20A                      | AGTACCTGGACGATATCTCGCTTTACGTGGCCGTGGAAT    |
| Cnp-1 R21A                      | CGTAGTACCTGGACGATATGCCTTTTTACGTGGCCGTGG    |
| Cnp-1 Y22A                      | CGCCGTAGTACCTGGACGAGCTCTCTTTTTACGTGGCCG    |
| Cnp-1 R23A                      | TAACGCCGTAGTACCTGGAGCATATCTCTTTTTACGTGG    |
| Cnp-1 P24A                      | TCTTAACGCCGTAGTACCTGCACGATATCTCTTTTTACG    |
| Cnp-1 G25A                      | CTCTCTTAACGCCGTAGTAGCTGGACGATATCTCTTTTT    |
| Cnp-1 T26A                      | AATCTCTCTTAACGCCGTAGCACCTGGACGATATCTCTT    |
| Cnp-1 T27A                      | TCGAATCTCTCTTAACGCCGCAGTACCTGGACGATATCT    |
| Cnp-1<br>P10.13.15.17A<br>(4PA) | ACGATATCTCTTTTTACGTGCCCGTGCAATAGCATCTCCAGC |
| Cnp1 P13A                       | TTTACGTGGCCGTGGAATAGCATCTCCAGGCTCAGCCAT    |
| Cnp-1 P15A                      | TCTCTTTTTACGTGGCCGTGCAATAGATCTCCAGGCTC     |
| Cnp-1<br>P13.15A                | TCTCTTTTTACGTGGCCGTGCAATAGCATCTCCAGGCTC    |

| <b>Site mutated<br/>(Primers with<br/>cloning sites)</b> | <b>5'- 3'</b>                            |
|----------------------------------------------------------|------------------------------------------|
| Cnp-1 NdeI<br>K3A For                                    | GAACAACCTTCATATGGCAGCGAAATCTTTAATGGCTGAG |
| Cnp-1 NdeI<br>K4A For                                    | GAACAACCTTCATATGGCAAAGGCATCTTTAATGGCTGAG |
| Cnp-1 NdeI<br>S5A For                                    | GAACAACCTTCATATGGCAAAGAAAGCTTTAATGGCTGAG |
| Cnp-1 NdeI<br>L6A For                                    | GAACAACCTTCATATGGCAAAGAAATCTGCAATGGCTGAG |



|                            |                                                                  |
|----------------------------|------------------------------------------------------------------|
| Cnp-1 Ndel<br>M7A For      | GAACAACTTCATATGGCAAAGAAATCTTTAGCGGCTGAG                          |
| cnp-1 flank<br>For 2       | GCTTGGGTTTCATATGATTAATTTCTCTTACC                                 |
| cnp-1 flank<br>Rev         | CGGTTAACGGATCCAGTAGATGAATTC                                      |
| WT(Ndel) For               | TGAATTCCATATGGCAAAGAAATCTTTAATGG                                 |
| CNB(BamHI)<br>Rev          | ACGGGATCCTCAAGCACCACGAATCCTC                                     |
| CNN(NotI)<br>Rev           | TGAATTCTCGAGCGGCCGCGAGCACCACGAATCCTC                             |
| ani1(Ndel) For             | GGAATTCCATATGTCTCTTCCAATTGCT                                     |
| ani2(Ndel) For             | GGAATTCCATATGAGTAAGGAAGAGACC                                     |
| ani1-PPIase<br>(BamHI) Rev | GGAATTCCGGATCCTTAGGGACTAGAAGGTGCATT                              |
| ani2-PPIase<br>(Sacl) Rev  | GGAATTCCGAGCTCTTAATAAGTTTTGTAGACTT                               |
| ani1(BamHI)<br>Rev         | CGCGGATCCTTAGTGAACGCGAACAAGC                                     |
| ani2(Sacl) Rev             | GGAATTCCGAGCTCTTAATTAACCGCTAAAAG                                 |
| sim3(Ndel)<br>For          | GTTACGCGAcatATGTCTTCTGATACGAAAACACTG                             |
| sim3 x6HIS<br>(BamHI) Rev  | ACTAATTGTGGATCCTTAGTGGTGATGGTGATGATGATCCTTCTTTTTCTTATCT<br>TTAGG |

| <b>Centromere-Specific Primers</b> |                        |
|------------------------------------|------------------------|
|                                    | <b>Forward 5'- 3'</b>  |
| cnt G                              | CGTAAATGATAATTTCAACCCG |
| cnt T                              | AACAATAAACACGAATGCCTC  |
| act1                               | GAGTCCAAGACGATACCAAGTG |
| NDR                                | TGATCTATCGATCGAGAGC    |
|                                    | <b>Reverse 5'- 3'</b>  |
| cnt G                              | CAGACGACTTAAATGGATTGG  |

|       |                       |
|-------|-----------------------|
| cnt T | ATAGTACCATGCGATTGTCTG |
| act1  | GGCATCACACTTTCTACAACG |
| NDR   | TGAGATGCTGAGAAGGTAG   |

| <b>6xHis-Tagged primers</b> |                                         |
|-----------------------------|-----------------------------------------|
|                             | <b>Forward 5'-3'</b>                    |
| ani1 (EcoRI)                | GGATGTCGATATCATGTCTCTTCCAATTGCTGTTTATAG |
| ani2 (EcoRV)                | GGATGTCGATATCATGAGTAAGGAAGAGACCCTTTACAG |
| Sim3<br>F(EcoRV)            | GGATGTCGATATCATGTCTTCTGATACGAAAACACTG   |
|                             | <b>Reverse 5'-3'</b>                    |
| ani1 (BamHI)                | CGCGGATCCTTAGTGAACGCGAACAAGC            |
| ani2 (EcoRI)                | CCGGAATTCTTAATTAACCGCTAAAAGCTTTAC       |
| Sim3<br>R(BamHI)            | CGCGGATCCATCCTTCTTTTTCTTATCTTTAGGACC    |

**Supplementary Table S3** Sequences of peptides.

| <b>Peptide Sequences for Peptide Pull-Down Experiments</b> |                                                    |
|------------------------------------------------------------|----------------------------------------------------|
| WT/FL                                                      | MAKKSLMAEPGDPIPRPRKKRYRPGTTALRK[BIOTIN]            |
| 4PA                                                        | MAKKSLMAEAGDAIARARKKRYRPGTTALRK[BIOTIN]            |
| H3 NTD                                                     | MARTKQTARKSTGGKAPRKQLASKAARKAAPATGGVKKPHRK[BIOTIN] |
| H3 PA                                                      | MARTKQTARKSTGGKAARKQLASKAARKAAAATGGVKKAHRK[BIOTIN] |
| <b>Peptide Sequence for NMR Experiments</b>                |                                                    |
| P15FR16K                                                   | SLMAEPGDPIFKPR                                     |
| P17FR18K                                                   | SLMAEPGDPIPRFK                                     |
| WT                                                         | SLMAEPGDPIPRPR                                     |

## Supplementary Figure 1

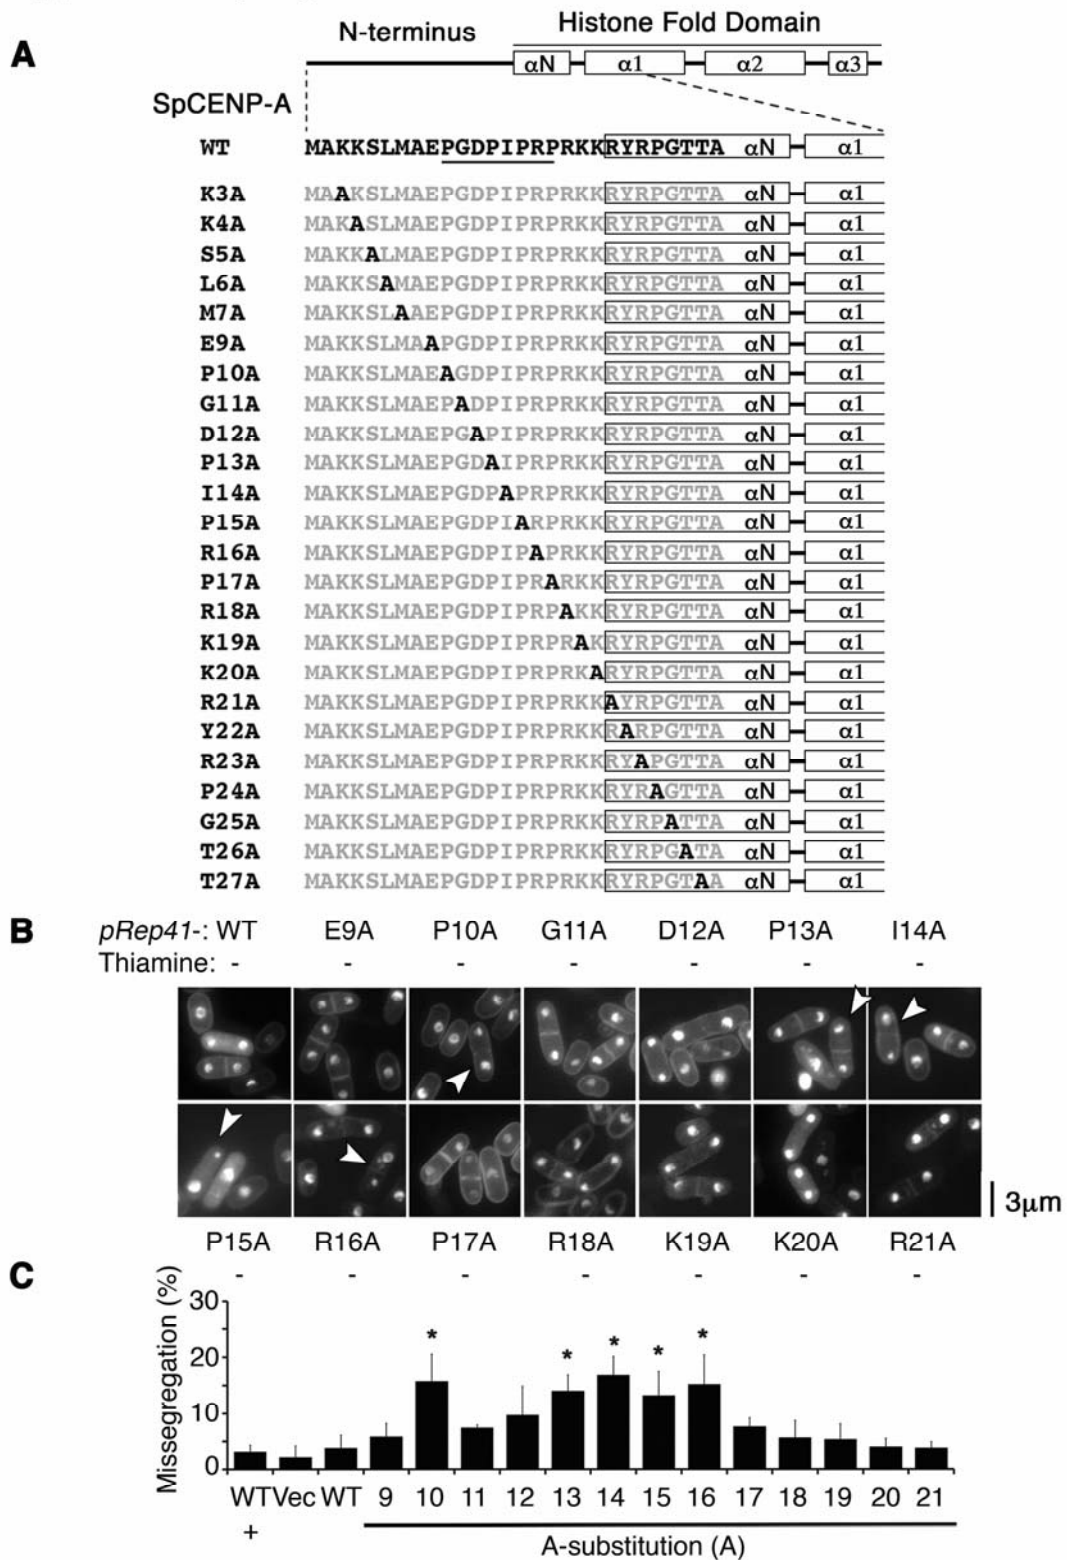

Supplementary Figure 1 Chromosome missegregation induced by the ectopic expression of amino-terminal domain (NTD) alanine-substitution mutant *cnp1* genes. (A) 24 site-directed, single-alanine substitution *cnp1* constructs. “A” in black

indicates the position of the alanine mutation, whereas the non-mutated residues are in grey. Constructs were expressed with the *nmt41* promoter. Wild-type (WT) cells transformed with full length, vector (vec) and *cnp1*-N-terminal single amino acid mutant constructs (*pRep41*-E3A to T27A). The “GRANT” (Genomic stability-Regulating site within CENP-A N-Terminus) residues (P10 to P17) are underlined. (B) Phenotype of WT cells expressing the constructs shown in part (A). Numerous cells show unequal chromosome segregation. Arrowhead: Unequal chromosome segregation. (C) Quantification of phenotype in part (B). + and -, + thiamine and - thiamine. Two tailed *t-test*. \* $p < 0.05$ ; N=200. Bar: S.D. Bar plot indicates mean of three biological replicates.

## Supplementary Figure 2

|                                            |    |              |       |             |               |     |
|--------------------------------------------|----|--------------|-------|-------------|---------------|-----|
| <i>Schizosaccharomyces Pombe</i> cnp1      | 1  | MAKKSLMAE    | PGDPT | PHPRKKRYR   | PGTTAL        | 29  |
| <i>Schizosaccharomyces cryophilus</i> cnp1 | 1  | MAKKSLMAE    | PGDPT | PHPRKKRYR   | PGTMAL        | 29  |
| <i>Schizosaccharomyces octosporus</i> cnp1 | 1  | MAKKSLMAE    | PGDPT | PHPRKKRYR   | PGTMAL        | 29  |
| <i>Schizosaccharomyces japonicas</i> cnp1  | 1  | MAKRSFVAE    | PGDPT | PHYPRKKRYR  | PGTIAL        | 29  |
| <i>Rosellinia necatrix</i> cse-4           | 24 | GSGGAPEVL    | PGDPT | PHYPRRRRYR  | PGTVAI        | 52  |
| <i>Lepidopterella palustris</i> OCK80818   | 39 | LGRRRGDVQ    | PGDPT | PHYPKKRRYK  | PGTVAL        | 67  |
| <i>Rhinochlamydia mackenziei</i> CSE4      | 23 | GGGKRLRAQ    | PGDPT | PEVKKP      | RRYKPGTQAL    | 51  |
| <i>Fonsecaea pedrosoi</i> CSE4             | 31 | TSGKRLRAQ    | PGDPT | PEVRRP      | RRYRPGTLAL    | 59  |
| <i>Fonsecaea erecta</i> CSE4               | 31 | VSGKRLRAQ    | PGDPE | PEVRRP      | RRYRPGTLAL    | 59  |
| <i>Fonsecaea multimorphosa</i> cnp1        | 31 | VGGKRLRAQ    | PGDPE | PEVRRP      | RRYRPGTLAL    | 59  |
| <i>Exophiala xenobiotica</i> cnp1          | 34 | RPRGRPRAQ    | PGDPT | PETRKPE     | RRYRPGTIAL    | 55  |
| <i>Exophiala sideris</i> cnp1              | 30 | SAGGRPRAQ    | PGDPT | PEVRRP      | RRYKPGTMLR    | 59  |
| <i>Cladophialophora bantiana</i> CSE4      | 40 | IAGKRPRRAQ   | PGDPE | PEVRRP      | RRYRPGTLAL    | 59  |
| <i>Capronia coronate</i> CENP-A            | 30 | TSGRRGRAQ    | PGDPE | PEMRKPE     | HRFKPGTIAL    | 58  |
| <i>Hordeum bulbosum</i> CENP-A             | 48 | PAPAADQGA    | PGEP  | PKKRP       | PHRYRPGTVAL   | 75  |
| <i>Verruconis gallopava</i> cnp1           | 39 | APRRRSDIK    | PGDPT | IQHGKKRRYK  | PGTVAL        | 67  |
| <i>Festuca lenensis</i> CENH3              | 44 | ARRPAATAA    | PGA   | PAQQRVKK    | PHRYRPGTV     | 72  |
| <i>Coccidioides immitis</i> cse-4          | 82 | TSSRQSDVQ    | GD    | LEP         | TRRHHYHPGTVAL | 110 |
| <i>Blumeria graminis</i>                   | 7  | HMSAVTAIQ    | PGDPT | PERERKRRYR  | PGTAAL        | 35  |
| <i>Pseudogymnoascus verrucosus</i> hH3v    | 34 | KRLSYSAVE    | PGDPE | PEQRKKRRYH  | HPGTVAL       | 62  |
| <i>Pneumocystis carinii</i> cnp1           | 23 | LAGASGNIE    | PGDPT | PEFRGKARRYR | PGTVAL        | 55  |
| <i>Colletotrichum salicis</i> cse-4        | 13 | RKSRQSDVQ    | PGDPT | PENRGKRRYR  | PGTVAL        | 41  |
| <i>Diaporthe ampelina</i> cse-4            | 3  | PKRRRSDVQ    | PGDPE | PEQGRRYR    | YRPGTKAL      | 31  |
| <i>Magbaporthe oryzae</i> cse-4            | 17 | GASRDSGVMP   | PGDPT | PEQKKSRRYR  | PGTLAL        | 45  |
| <i>Pestalotiopsis fici</i> cse-4           | 16 | GRGRGSGVR    | PGDPE | PEAGRRRRYR  | PGTLAL        | 44  |
| <i>Vulsa mali</i> hH3v                     | 24 | GRPRTSNVQ    | PGDPE | PEQGGKRYR   | YRPGTKAL      | 52  |
| <i>Sporothrix schenckii</i> CENP-A         | 34 | KPARTSNVQ    | PGDPE | PEQRKQRRYR  | PGTLAL        | 54  |
| <i>Aspergillus oryzae</i> ces-4            | 52 | GASRKSVDVQ   | PGDPT | PEQGRHRRYR  | PGTVAL        | 80  |
| <i>Gaeumannomyces graminis</i> cse-4       | 17 | AAARNSNVM    | PGDPE | PEQRKARRYR  | PGTLAL        | 45  |
| <i>Paracoccidioides brasiliensis</i> CSE4  | 56 | VGDRTTDIQ    | PGDPE | PEFRRHHYR   | YRPGTVALKE    | 84  |
| <i>Emmonsia crescens</i> CENP-A            | 59 | AQARTTDIQ    | PGDPT | PERRRRYK    | PGTLALKE      | 87  |
| <i>Komagataella phaffii</i> CENP-A         | 54 | SSTGISRNQ    | PGDPE | PEFAKKRYR   | KPGTLAL       | 82  |
| <i>Penicillium roqueforti</i> CENP-A       | 51 | VSKSPANVQ    | PGDPT | PEFTGRRRRYK | PGTVAL        | 69  |
| <i>Talaromyces islandicus</i> cse-4        | 69 | KKPRTSNIQ    | PGDPT | PEFTGRRRRYK | PGTVAL        | 97  |
| <i>Podospora anserina</i> CSE4             | 14 | PLPYTKPKAGD  | PE    | PEQGRKRRYR  | PGTLAL        | 42  |
| <i>Fusarium oxysporum</i> cse-4            | 1  | MILAGDPE     | PEV   | PEVRAKRRYR  | PGTVAL        | 23  |
| <i>Madurella mycetomatis</i> hH3v          | 34 | LLLTTVSDTAGD | PE    | PEQGGKRRYR  | PGTLAL        | 62  |
| <i>Pneumocystis jirovecii</i> CSE4         | 30 | IERMYTAYTSGD | PE    | PEVRAKRRYR  | PGTVAL        | 58  |
| <i>Candida albicans</i> CSE4               | 33 | PRHDSDFIAGD  | PE    | PENRGRRYK   | PGTVAL        | 61  |
| <i>Pyronema omphalodes</i> cnp1            | 97 | PARKSPATRAGD | PE    | PETRRKNRAR  | PGTKAL        | 125 |

**Supplementary Figure 2 GRANT motif is conserved.** Alignment of the CENP-A NTD highlighting the prolines corresponding to the “GRANT” (Genomic stability-Regulating site within CENP-A N-Terminus) motif in *Schizosaccharomyces pombe* (*S. pombe*) that contains prolines at positions 10, 13, 15 and 17.

## Supplementary Figure 3

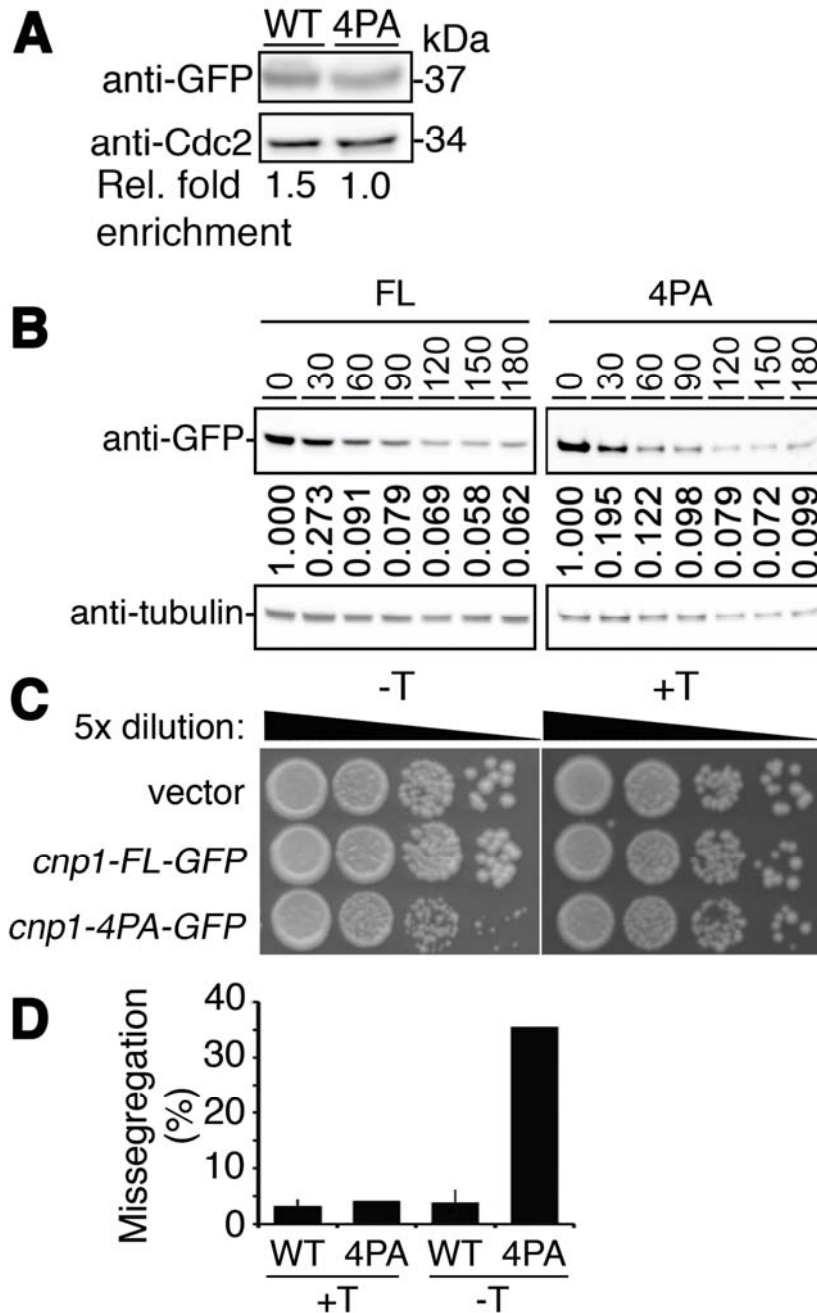

**Supplementary Figure 3 *cnp1-4PA* (P10AP13AP15AP17A) mutation-induced chromosome missegregation.** (A) Protein level of GFP-tagged SpCENP-A (wild type, WT) and SpCENP-A-4PA constructs expressed in WT cells 18 h after the removal of thiamine from the culture media. Level of Cdc2 (detected with anti-

PSTAIRES/Cdc2) was included as a loading control. Rel. fold enrichment, relative fold of protein level to WT.(B) Protein turnover of GFP-tagged full length (FL) versus 4PA SpCENP-A at 30-min intervals after treatment with 100  $\mu$ g/ml cycloheximide (CHX), 18 h after protein induction at 30°C in EMM-leucine, thiamine-free media. The level of  $\alpha$ -tubulin was employed as a loading control. Values represent the relative protein levels with respect to that at 0 min. Results shown represent one of two repeated experiments. (C) Growth of cells expressing vector, *cnp1-FL-GFP*, and *cnp1-4PA-GFP* constructs in WT cells at 30°C, day 2. +T and -T: with or without thiamine; *nmt41* promoter. (D) Frequency of bi-nucleated cells exhibiting a chromosome missegregation phenotype in WT cells expressing *cnp1*<sup>+</sup> (WT) and *cnp1-4PA* (4PA) constructs. +T and -T: with or without thiamine, 18 h, 30°C; *nmt41* promoter. N=200, Error: S.D. Bar plot indicates the mean of at least two biological replicates.

## Supplementary Figure 4

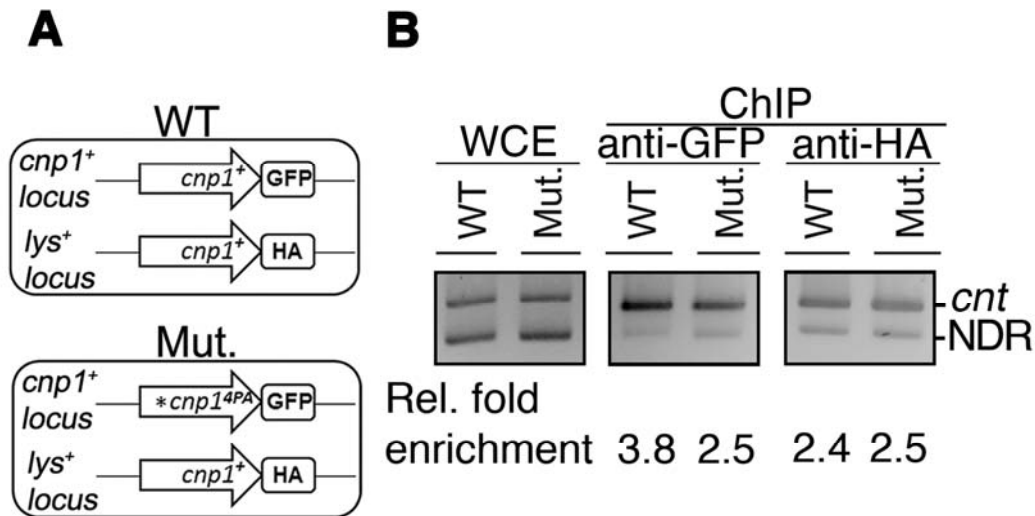

**Supplementary Figure 4 Mutation of GRANT-prolines disrupts the localization of SpCENP-A to the centromere.** (A) Genotype of the two strains for which chromatin immunoprecipitation (ChIP) was performed. These two strains contained two copies of *cnp1*<sup>+</sup> genes at the original as well as *lys1*<sup>+</sup> loci. Wild type (WT) strain (top) hosted a non-mutated *cnp1*<sup>+</sup> gene at the original gene locus, whereas the mutant (Mut.) strain contained *cnp1-4PA*. \**cnp1*<sup>4PA</sup> indicates a mutated *cnp1*<sup>+</sup> gene. HA- and GFP-tags were linked to the *cnp1*<sup>+</sup> copy at the *lys1*<sup>+</sup> and the original loci, respectively. (B) ChIP assay for WT and 4PA-mutated (Mut.) SpCENP-A at the central core region of centromere 1 (*cnt*). Anti-HA antibodies detected ChIP signals of WT SpCENP-A-HA expressed from the *lys1*<sup>+</sup> locus, whereas anti-GFP antibodies detected ChIP signals of WT or mutant SpCENP-A-GFP signals expressed from the authentic *cnp1*<sup>+</sup> chromosomal locus. WCE, Whole cell extract; NDR, nucleosome-depleted region as normalization control. Representative image of three biological replicates.



## Supplementary Figure 5

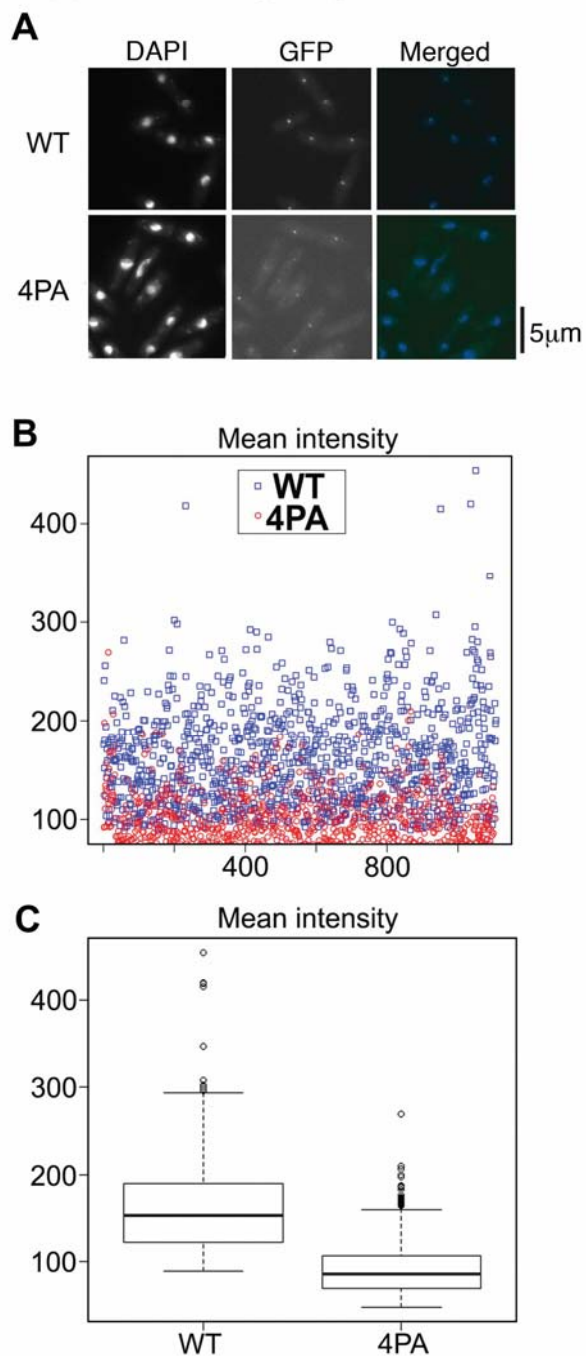

**Supplementary Figure 5 Mutation of GRANT-prolines disrupts the localization of SpCENP-A to the centromere.** (A) Localization of wild-type SpCENP-A-GFP (WT; top) and 4PA-mutated SpCENP-A-GFP (4PA; bottom), produced from GFP-fused *cnp1*<sup>+</sup> genes at the original locus. The strain used is depicted in Supplementary Figure 4A. DAPI, GFP and merged signals are shown. Bar: 5  $\mu$ m. (B) Scatter plot

showing the mean intensity distribution of the WT (blue) and 4PA (red) SpCENP-A-GFP spots, obtained by dividing the sum pixel intensity in each GFP spot by the total area of the spot. N=1000. (C) Box plot for mean GFP intensity signal in part (B). Maximum and minimum values within the interquartile range and multiplied by 1.5 are represented by the ends of the whiskers. Outliers are denoted by points beyond whisker ends. The boxes indicate the 25<sup>th</sup>, 50<sup>th</sup> (mean) and 75<sup>th</sup> percentiles. A statistical comparison of the differences in the variances between WT and 4PA was performed with a F-test, followed by a comparison with the Welch *t*-test; the variance is estimated separately for each dataset using Welch modification of the degrees of freedom. A statistical significant difference between WT and 4PA GFP intensity ( $p < 2.2 \times 10^{-16}$ ) was detected.

## Supplementary Figure 6

**A**

| Accession  | emPAI | emPAI-N    | Description                                              |
|------------|-------|------------|----------------------------------------------------------|
| FKBP4_SCHP | 0.1   | 0.00026534 | FK506-binding protein 39 kDa OS=Schizosaccaromyces pombe |

Matched sequence in Blue underlined  
 >FKBP39 (SpAni1)  
**MSLP**IAVYLS**SVK**GKDVPAVEESTDASIHLMASIDAGEKSNKPTLLVKVRPRIPVEDE  
 DDEELDEQMQELLEESQREFVLCTLKPGLYQQPLNLTITPGDEVFFSASGDATIHLSGN  
 FLVDEEDEEEEESEDEDYDLSPTTEEDLVETVSGDEESESESESEEDNSASEEDELDSAPAKK  
 AQVKKKRTKDESEQEEAASPKNNTKKQKVEGTPVKEKKVAFAEKLEQGPTGPAKKEKQ  
 QASSNAPSSPKTRTLKGGVVVTDVKTGSGASATNGKKVEMRYIGKLENGKVFDKNTKGGP  
 FAFILGRGEVIRGWDVGVAGMQEGGERKITIPAPMAYGNQSIPIGIPKNSTLVFEVKLVRVH

**B**

|        |                                                               |
|--------|---------------------------------------------------------------|
| ScFpr3 | MSDLLPLATYSLNVEPYTPVPAIDVT-----MPITVRITMAALNPEAIDEENKPTLRI    |
| ScFpr4 | MSDMLPLATYSLNVEPYSPALNFK-----IPVTIRITMAALDPEPFDDDKKPTLRI      |
| SpAni1 | MS--LPTAVYLSVKGKD-VPAVEES-----TDASIHLMASIDAGEKSNKPTLLVKV      |
| SpAni2 | MS--KEETLYSVKVDQER-VPLFDEDFYKGRSELSVRFTMAALDPRAKSNDAVTVNVIT   |
| ScFpr3 | IKRNPDEFDDDFLGGDFDEDEIDEESEEEEEKTKKKKSKGKAE--SESEDEEDDD       |
| ScFpr4 | IKRNPDELTRGEYQNDDNGLEDESESEQEAADVPKRSVSKKGGKAVEQSESEDESE      |
| SpAni1 | RPRIPVEDEDEELDEQMQELLEESQ-----                                |
| SpAni2 | RLEHPEED-GEESDEELFQEEK-----                                   |
| ScFpr3 | EDEFQESVLLTLSPEAQYQQLDITIPPEEVEQFIVTG--SYATSLSGNYVKHPFDTPMG   |
| ScFpr4 | IDDEFEECVLLTSPKGYQQALDITIAPEEVEQFVVVG--SYTISLTGNVYKHPFDNSSD   |
| SpAni1 | ----REFVLCNLKPGSLYQQPLNLTITPGDEVFFSASG-DATIHLSGNFLVDEEDEEEE   |
| SpAni2 | -----FTLCTLKKGSVYQQPIDIIFSEGEVFFERVCGDIPVYLSGTCIITNIPPEED     |
| ScFpr3 | VEGED-----EDEDADIYDSEDYDLTPDEDEIIGDDMDDLDEEEEEEVRIEVEQEEDE    |
| ScFpr4 | SDEDE-----EDYSDDESS-----NGEEEEEEEPEDDEEL_SGDD                 |
| SpAni1 | ESDED-----YDLSPTTEED-----LVETVSGDEESESESEEDNSASEE             |
| SpAni2 | SSDLENDFLYGADEFSSDEEE-----MDDISVTSSEEEEEEENGARIEELNS          |
| ScFpr3 | EDNDGEEEEEEEEEQKEEVKPEPKKSKKEKRRKHEEKEEKKAKKVKVVEFKKDLEEG     |
| ScFpr4 | DLDDLVDASDIESRLDELVKKDEKKNNKDSKRRKHEEDEESAKPAEKKQTTKKDKKAE    |
| SpAni1 | DELDSAPAKKAQVK-KKRTKDESEQEEAASPKNNTKKQKVEGTPVKEKKVAFAEKLEQG   |
| SpAni2 | DEEDAEOAEEIILE-KVPVKDEVAEKHSKDKLK---KEEKEKKTAVDVSDSVNGKRRKTE  |
| ScFpr3 | PTKPKSKKEQ-----DKHKPKSKVLEGGIVIEDRTIGDGPQAKRGRVGMRYIGKLNK     |
| ScFpr4 | KVK---DSEE-----SKPKPKTKLLEGGIIEEDRVTKGPHAKKGRVGMRYIGKLNK      |
| SpAni1 | PTGPAAKKEKQASSNAPSSPKTRTLKGGVVVTDVKTGSGASATNGKKVEMRYIGKLENG   |
| SpAni2 | PAGEGEQTEKK---SKSTKTYPKQVLEGNVTVQDKVKGDGPAKRKRKRVSRYIGRLTNG   |
| ScFpr3 | KVFDKNTSGKPFPAFKLGRGEVIKWDIGVAGMSVGGERRIIPAPYAYGKQALPGIPANS   |
| ScFpr4 | KVFDKNTKPKPFVFKLGOGEVIKWDIGVAGMAVGGERRIVIPAPYAYGKQALPGIPANS   |
| SpAni1 | KVFDKNTKPKPFAFILGRGEVIRGWDVGVAGMQEGGERKITIPAPMAYGNQSIPIGIPKNS |
| SpAni2 | KVFDKNTKPKPFTFNLGLEEVIKWDVGVGMVGGERRIIPAPMAYGSKRLPGIPANS      |
| ScFpr3 | ELTFDVKLVSMKN                                                 |
| ScFpr4 | ELTFDVKLVSMK-                                                 |
| SpAni1 | TLVFEVKLVRVH-                                                 |
| SpAni2 | DLVFDVKLLAVN-                                                 |

Supplementary Figure 6 An FKBP-type *cis-trans* peptidyl prolyl isomerase affinity purified with wild type (WT) SpCENP-A N-terminal domain (NTD). (A) Mass spectrometry identified a novel coding sequence, which was predicted to be a 39-kDa FK506-binding protein from fission yeast. The peptide isolated using mass spectrometry is highlighted in blue. This putative isomerase has been named

SpCENP-A NTD Isoomerase 1 (Ani1). (B) Alignment revealed that the fission yeast genome contains another unknown gene, SPAC27F1.06c, which encodes an Ani1-like protein (named Ani2). Ani1 and Ani2 share high sequence similarity with the Fpr3 and Fpr4 proline *cis-trans* isomerases from budding yeast across the isomerase catalytic domain. Sp: *Schizosaccharomyces pombe* and Sc: *Saccharomyces cerevisiae*. | indicates the point of C-terminal truncation.

## Supplementary Figure 7

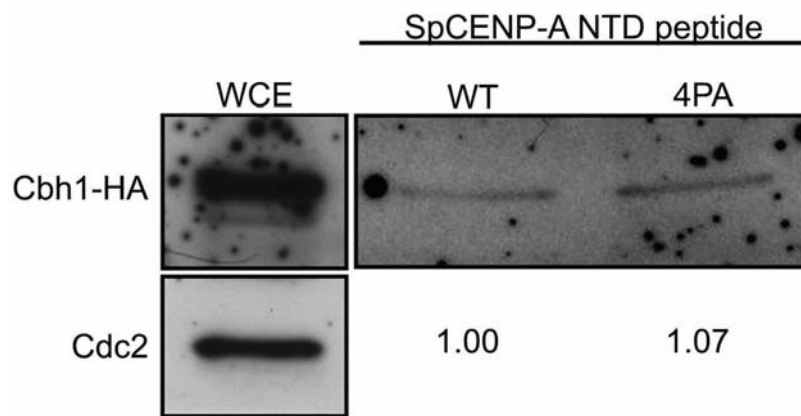

**Supplementary Figure 7 SpCENP-A N-terminal domain (NTD) interacts with Cbh1-HA independent of proline residues.** Peptide pull-down of wild type (WT) and mutant 4PA SpCENP-A and Cbh1-HA. WCE, Whole cell extract. Cdc2, input.

## Supplementary Figure 8

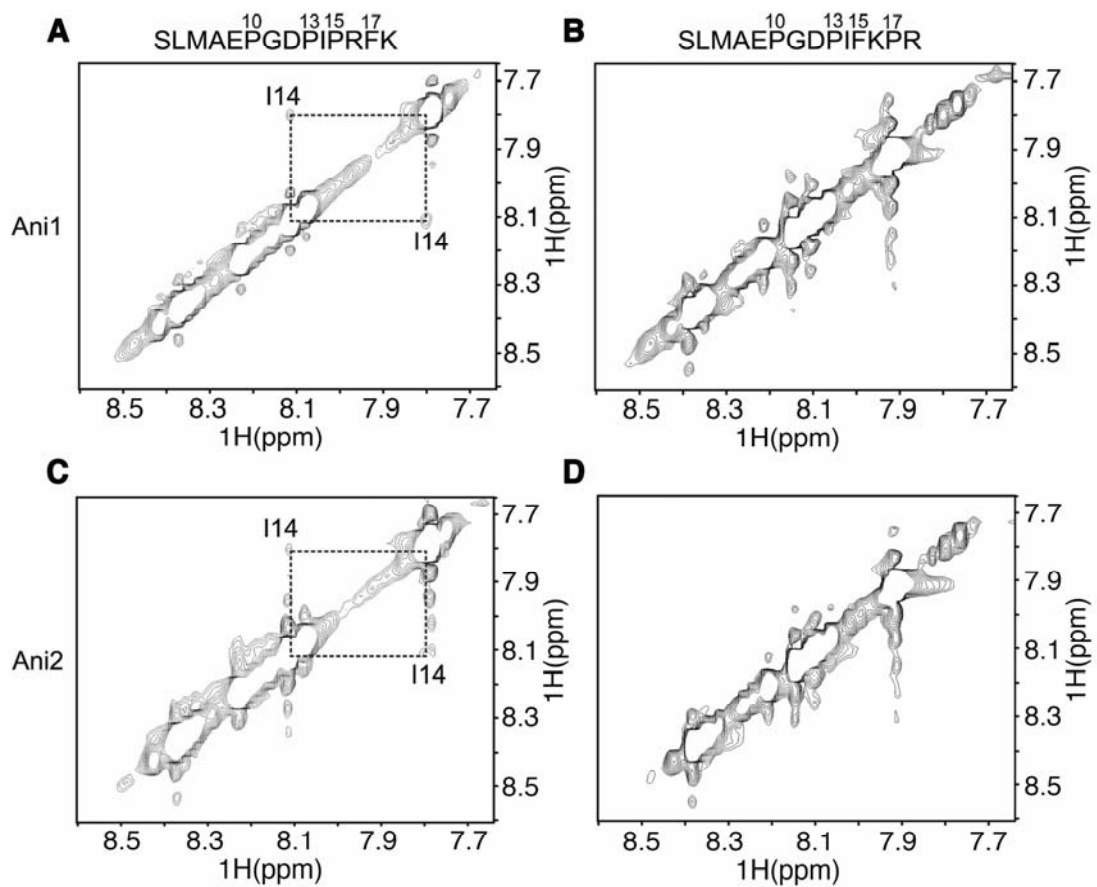

**Supplementary Figure 8 Proline-15 within the SpCENP-A N-terminal domain (NTD) is the target of prolyl isomerization by Ani1 and Ani2.** (A–D) Rotating frame Overhauser effect spectroscopy (ROESY) nuclear magnetic resonance (NMR) profiles obtained by incubating recombinant Ani1 and Ani2 with peptides SLMAEPGDPIPRFK (which hosts a P17FR18K mutation) and SLMAEPGDPIFKPR (which hosts a P15FR16K mutation). A cross peak at isoleucine (I)-14 was observed both in the case of (A) Ani1 and (C) Ani2 for peptide SLMAEPGDPIPRFK but not SLMAEPGDPIFKPR (B, D, respectively). Proline (P) and arginine (R) were mutated to phenylalanine (F) and lysine (K), respectively, to preserve the aromatic and basic nature of the original amino acid residues. Ani, SpCENP-A NTD-isomerase.

## Supplementary Figure 9

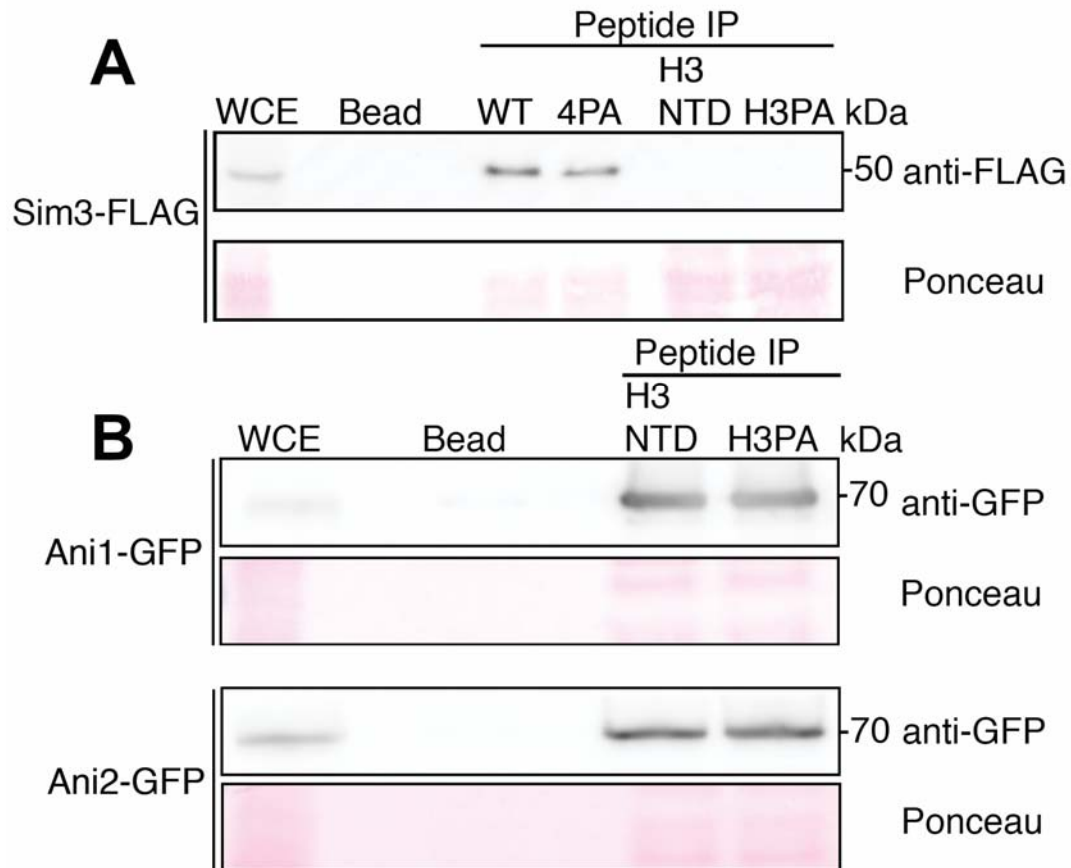

**Supplementary Figure 9 Physical interaction for wild type (WT) and mutant histone H3 N-terminus with Ani1-GFP, Ani2-GFP or Sim3, as examined by biotinylated peptide pull-down assays.** (A) Peptide immunoprecipitation (IP) of Sim3-FLAG with SpCENP-A WT and 4PA mutant peptides, WT histone H3 N-terminal domain (NTD) and H3 “PA” (proline → alanine) peptides. WCE, Whole cell extract. (B) Peptide IP of Ani1-GFP and Ani2-GFP with H3 NTD and H3 PA peptides. WCE, Whole cell extract; H3 NTD, WT histone H3 N-terminus (NTD) peptide; H3PA, Mutant H3 NTD peptide, in which all proline residues were mutated to alanine residues. Ponceau staining was used to confirm equal loading. Representative blot of three experimental replicates.
